# Supplementary material
Source: MDPI journal article supplement (https://www.mdpi.com/2073-4352/11/10/1187)
Supplement: s1 [file s1]

# **A Synergy Approach to Enhance Upconversion Luminescence Emission of Rare Earth Nanophosphors with Million-Fold Enhancement Factor**

**Duc Tu Vu** <sup>1,2</sup>, **Yi-Chang Tsai** <sup>1</sup>, **Quoc Minh Le** <sup>3</sup>, **Shiao-Wei Kuo** <sup>4</sup>, **Ngoc Diep Lai** <sup>5</sup>, **Henri Benisty** <sup>6</sup>, **Jiunn-Yuan Lin** <sup>1,7</sup>, **Hung-Chih Kan** <sup>1,7</sup> and **Chia-Chen Hsu** <sup>1,7,\*</sup>

<sup>1</sup> Department of Physics, National Chung Cheng University, Ming Hsiung, Chia Yi 621, Taiwan; tu.vuduc@phenikaa-uni.edu.vn (D.T.V.); hp2avatar1170@hotmail.com.tw (Y.-C.T.); phyjyl@ccu.edu.tw (J.-Y.L.); phyhck@ccu.edu.tw (H.-C.K.)

<sup>2</sup> Faculty of Electrical and Electronics Engineering, Phenikaa University, Yen Nghia, Ha Dong, Hanoi 12116, Vietnam

<sup>3</sup> Institute of Materials Science, Graduate University of Science and Technology, Vietnamese Academy of Science and Technology (VAST), 18 Hoang Quoc Viet, Cau Giay, Hanoi 12116, Vietnam; lequocminhvn@gmail.com

<sup>4</sup> Department of Materials and Optoelectronic Science, National Sun Yat Sen University, Kaohsiung, 804, Taiwan; kuosw@faculty.nsysu.edu.tw

<sup>5</sup> Laboratoire Lumière, Matière et Interfaces (LuMin), Institut D'Alembert, CNRS, Ecole Normale Supérieure Paris-Saclay, Université Paris-Saclay, CentraleSupélec, 4 avenue des Sciences, 91190 Gif-sur-Yvette, France; ngoc-diep.lai@ens-paris-saclay.fr

<sup>6</sup> Laboratoire Charles Fabry, CNRS, Institut d'Optique Graduate School, Université Paris-Saclay, 91127, Palaiseau, France; henri.benisty@institutoptique.fr

<sup>7</sup> Center for Nano Bio-Detection, National Chung Cheng University, Ming Hsiung, Chia Yi 621, Taiwan; phyhck@ccu.edu.tw

\* Correspondence: phyhck@ccu.edu.tw

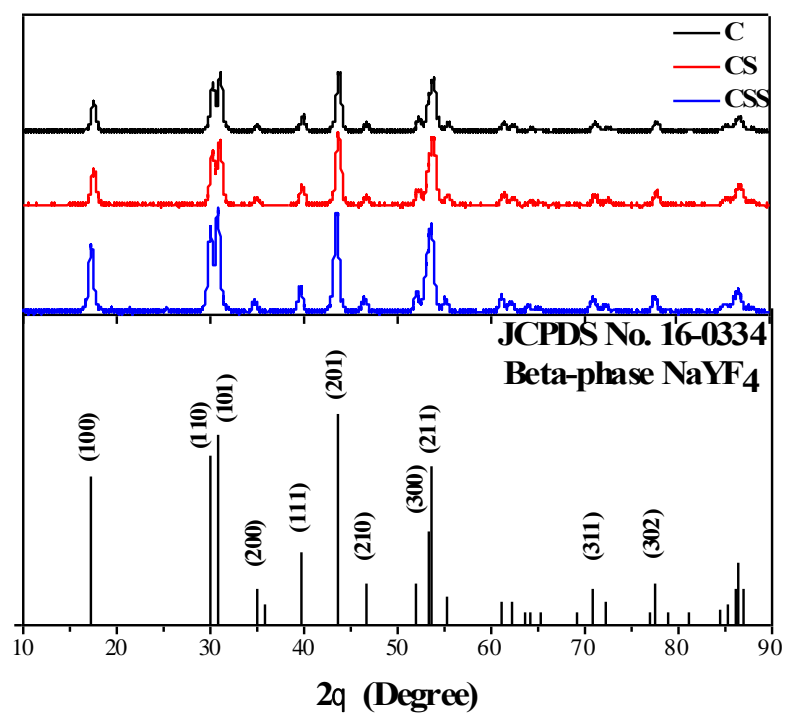

**Figure S1.** XRD pattern of C, CS, CSS UCNPs and standard  $\beta$ -phase  $\text{NaYF}_4$  data (JCPDS file no. 16-0334).

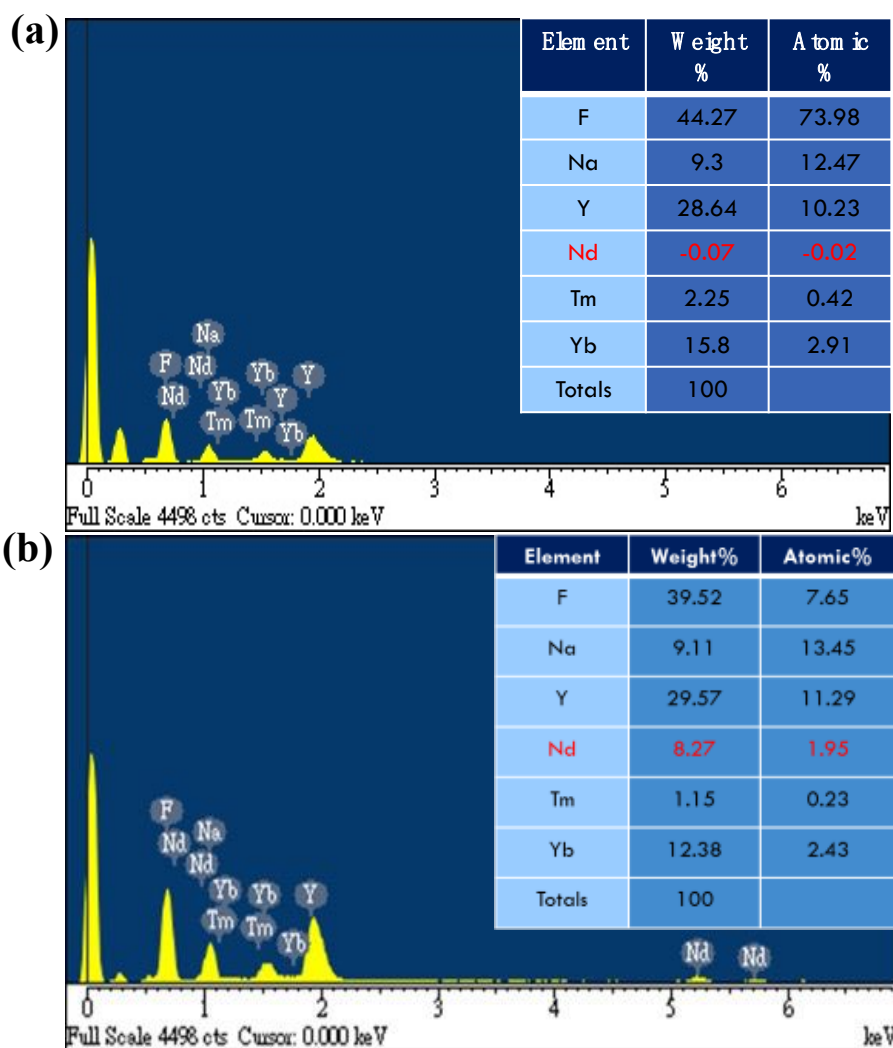

**Figure S2.** EDX spectra of (a)  $\text{NaYF}_4:\text{Yb}^{3+},\text{Tm}^{3+}$  core UCNPs, (b)  $\text{NaYF}_4:\text{Yb}^{3+},\text{Tm}^{3+}@\text{NaYF}_4:\text{Yb}^{3+},\text{Nd}^{3+}$  CS UCNPs.

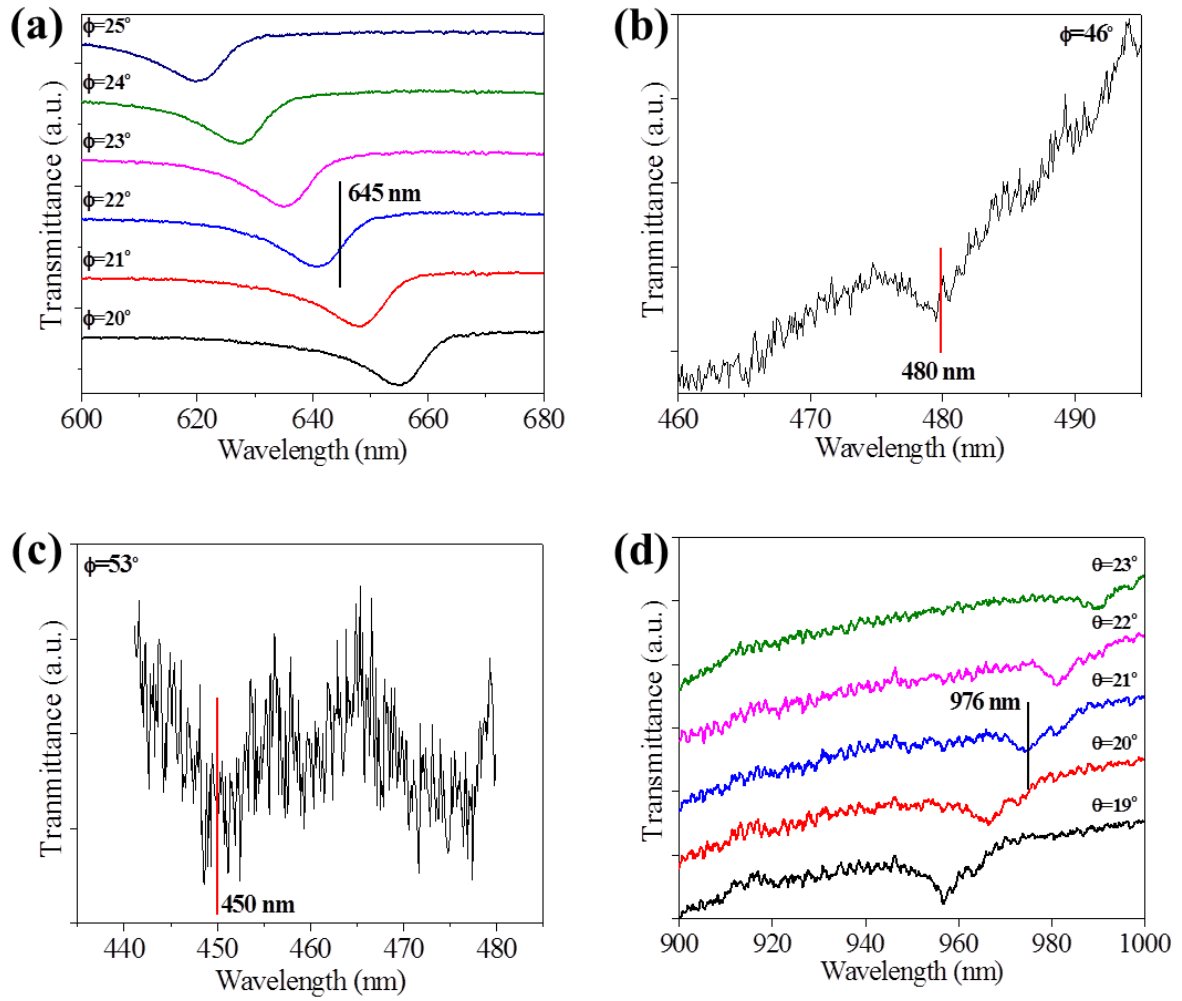

**Figure S3.** Angle-resolved transmission spectra of the low-n RWG deposited with CSS UCNP, (a) in the detection angle ( $\phi$ ) range of 20-25°, at the detection angle of (b) 46°, (c) 53°, and (d) in the excitation angle range of 19-23°. Vertical solid lines present three UCL emission peaks (645, 480, 450 nm) of CSS UCNP and excitation wavelength of 976 nm.

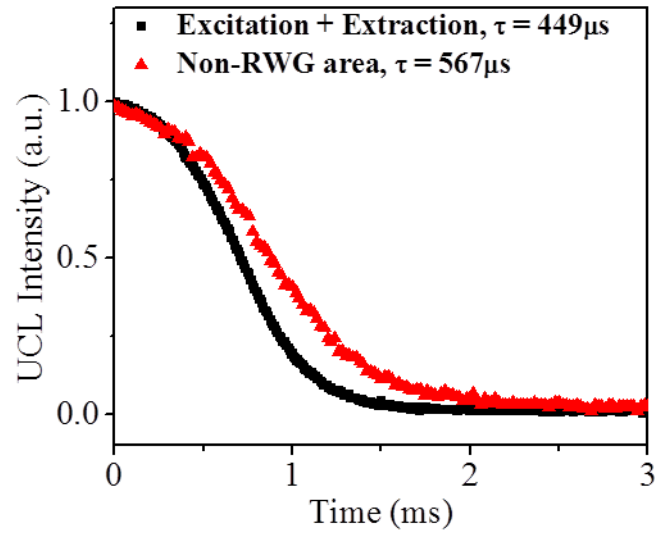

**Figure S4:** UCL lifetime measurement of the UCL emission at 450 nm obtained from the non-RWG area and the RWG area under *excitation + extraction resonance*.

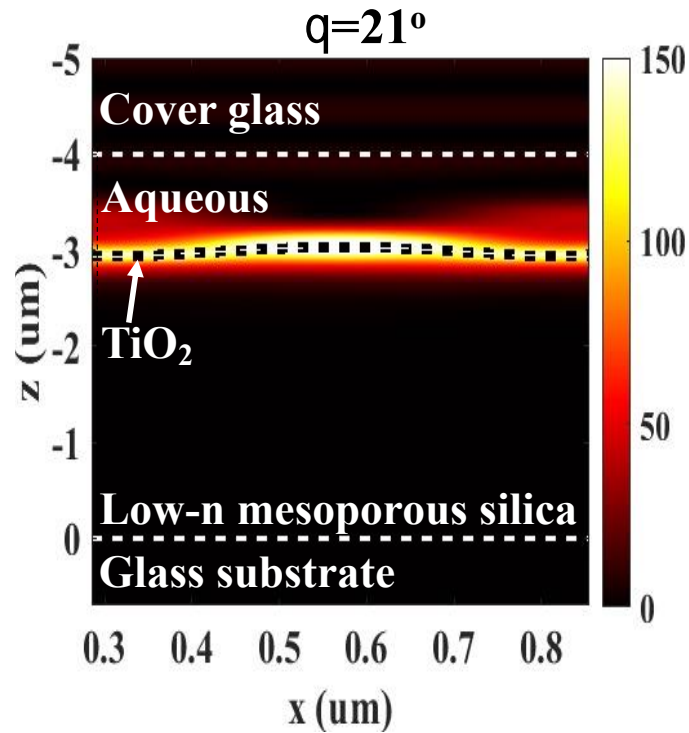

**Figure S5.** Calculated TE mode electric-field intensities ( $|E|^2$ ) under *resonant excitation* condition ( $\lambda = 976 \text{ nm}$ ,  $\theta = 21^\circ$ ) of the low-n RWG covered with aqueous solution.
